# Supplementary material for: Global Scale Dissemination of ST93: A Divergent Staphylococcus aureus Epidemic Lineage That Has Recently Emerged From Remote Northern Australia
Source: PubMed Central journal article supplement (PMC6047344; doi:10.3389/fmicb.2018.01453), 2018-07-09

**B**

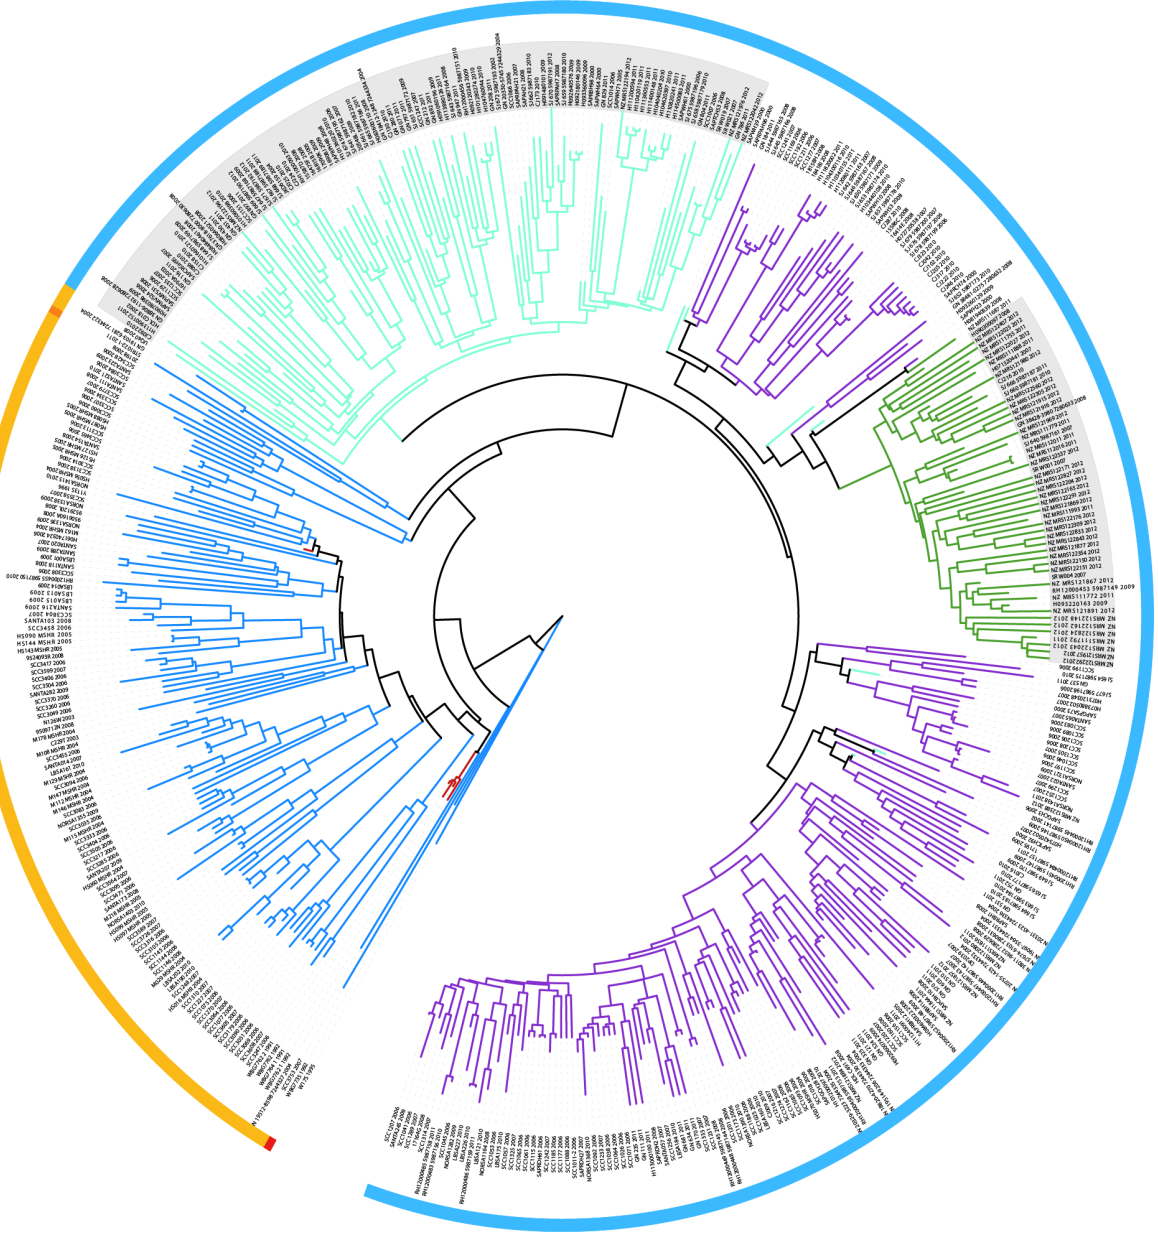

**A**

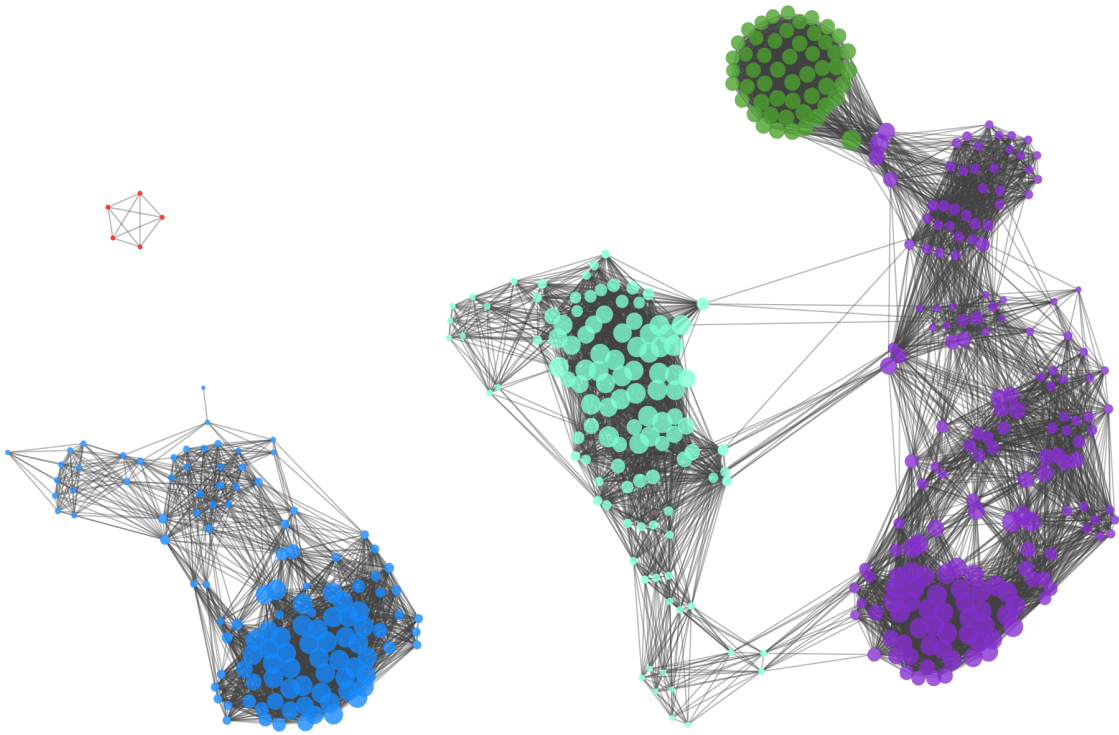

Supplement: Image_7.pdf [file Image_7.pdf]
