# Supplementary material for: Global Scale Dissemination of ST93: A Divergent Staphylococcus aureus Epidemic Lineage That Has Recently Emerged From Remote Northern Australia
Source: Front Microbiol. 2018 Jul 9;9:1453. doi: 10.3389/fmicb.2018.01453 (PMC6047344; doi:10.3389/fmicb.2018.01453)
Supplement: TABLE S4 — Non-synonymous mutations restricted to the branch defining the New Zealand clade. [file Table_4.XLSX]

## Sheet: Sheet1
Location	Ref	SNV	CDS locus	Gene	Amino acid change
30554	C	T	SAA6159_00023	adsA	Pro33Ser
484703	A	G	SAA6159_00425	treR	Asn222Asp
518318	C	A	SAA6159_00455	-	Ser110Arg
608909	C	T	SAA6159_00526	-	Ala133Val
1571096	G	T	SAA6159_01430	-	Gln57Lys
1654899	C	T	SAA6159_01519	-	Gly39Arg
1673984	G	A	SAA6159_01541	AHS2	Arg210Cys
1868207	G	A	SAA6159_01706	-	Thr115Met
